# Supplementary material for: Interleukin-33 regulates intestinal inflammation by modulating macrophages in inflammatory bowel disease
Source: Sci Rep. 2017 Apr 12;7:851. doi: 10.1038/s41598-017-00840-2 (PMC5429815; doi:10.1038/s41598-017-00840-2)
Supplement: Supplementary file 1 — Supporting Information [file 41598_2017_840_MOESM1_ESM.pdf]

## Supporting Information

Interleukin-33 Regulates Intestinal Inflammation by Modulating Macrophages in  
Inflammatory Bowel Disease

Dong Hyuk Seo, BS,<sup>1,2,3\*</sup> Xiumei Che, MS,<sup>1,2,3\*</sup> Min Seob Kwak, MD,<sup>4,5\*</sup> Soochan Kim,  
PhD,<sup>1,3</sup> Jae Hyeon Kim, BS,<sup>1,2</sup> Hyun Woo Ma, BS,<sup>1,2</sup> Da Hye Kim, MS,<sup>1,3</sup> Tae Il Kim, MD,  
PhD,<sup>1</sup> Won Ho Kim, MD, PhD,<sup>1</sup> Seung Won Kim, PhD,<sup>1,2,3†</sup> and Jae Hee Cheon, MD,  
PhD,<sup>1,2,3†</sup>

<sup>1</sup>Department of Internal Medicine and Institute of Gastroenterology, Yonsei University  
College of Medicine, Seoul, Korea

<sup>2</sup>Brain Korea 21 PLUS Project for Medical Science, Yonsei University College of Medicine,  
Seoul, Korea

<sup>3</sup>Severance Biomedical Science Institute, Yonsei University College of Medicine, Seoul,  
Korea

<sup>4</sup>Department of Internal Medicine, Graduate School, Yonsei University College of Medicine,  
Seoul, Korea

<sup>5</sup>Department of Internal Medicine, Kyung Hee University Hospital at Gang Dong, Kyung  
Hee University School of Medicine, Seoul, Korea

<sup>\*,†</sup>These authors contributed equally to this work

## Supplementary Tables

**Table S1. Patient clinical characteristics**

| Characteristic                         | CD (69)     | UC (75)     | BD (74)     | NC (45)     |
|----------------------------------------|-------------|-------------|-------------|-------------|
| Age, yr, median (IQR)                  | 23.5 (8.6)  | 34.0 (21.0) | 41.0 (18.0) | 35.0 (2.0)  |
| Sex, (%)                               |             |             |             |             |
| Male                                   | 51 (73.9)   | 44 (58.7)   | 29 (39.2)   | 19 (47.5)   |
| Female                                 | 17 (24.6)   | 31 (41.3)   | 45 (60.8)   | 21 (52.5)   |
| UC extent, (%)                         |             |             |             |             |
| Proctitis                              |             | 13 (17.3)   |             |             |
| Left sided colitis                     |             | 45 (60.0)   |             |             |
| Extensive colitis                      |             | 17 (22.7)   |             |             |
| Location, (%)                          |             |             |             |             |
| L1 (ileal)                             | 14 (20.3)   |             |             |             |
| L2 (colonic)                           | 15 (21.7)   |             |             |             |
| L3 (ileocolonic)                       | 26 (37.7)   |             |             |             |
| L4 (only upper GI)                     | 4 (5.8)     |             |             |             |
| NA                                     | 10 (14.5)   |             |             |             |
| Behaviour at diagnosis, (%)            |             |             |             |             |
| B1 (nonstricturing, nonpenetrating)    | 16 (23.2)   |             |             |             |
| B2 (stricturing)                       | 25 (36.2)   |             |             |             |
| B3 (penetrating)                       | 18 (26.1)   |             |             |             |
| NA                                     | 10 (14.5)   |             |             |             |
| CDAI, median (IQR)                     | 94.3 (51.9) |             |             |             |
| pMayo score, median (IQR)              |             | 2.0 (3.0)   |             |             |
| DAIBD, median (IQR)                    |             |             | 20.0 (31.0) |             |
| Serum IL-33 level, median (ng/ml, IQR) | 0.09 (0.38) | 0.07 (0.10) | 0.07 (0.12) | 0.16 (0.37) |
| Serum sST2 level, median (ng/ml, IQR)  | 5.11 (1.56) | 5.76 (1.52) | 5.38 (1.47) | 4.50 (0.99) |
| ESR, mm/h, median (IQR)                | 30.0 (44.5) | 23.0 (33.0) | 27.0 (22.0) |             |
| CRP, mg/dL, median (IQR)               | 1.8 (7.0)   | 2.3 (6.0)   | 1.4 (7.0)   |             |

IQR, interquartile range; GI, gastrointestinal; NA, not applicable; pMayo, partial Mayo scoring index; CDAI, Crohn's disease activity index; DAIBD, disease activity index for intestinal Behcet's disease; NC, normal control.

**Table S2. Primers for qRT-PCR**

|                | Forward                 | Reverse                |
|----------------|-------------------------|------------------------|
| Mouse          |                         |                        |
| <i>Arg1</i>    | CTCCAAGCCAAAGTCCTTAGAG  | AGGAGCTGTCATTAGGGACATC |
| <i>β-Actin</i> | AGTGTGACGTTGACATCCGT    | TGCTAGGAGCCAGAGCAGTA   |
| <i>Cd163</i>   | GGTGGACACAGAATGGTTCTT   | CCAGGAGCGTTAGTGACAGC   |
| <i>Cd206</i>   | CAGGTGTGGGCTCAGGTAGT    | TGTGGTGAGCTGAAAGGTGA   |
| <i>Il10</i>    | GCCACATGCTCCTAGAGCTG    | CAGCTGGTCCTTTGTTTGAAA  |
| <i>Il33</i>    | TCCAACCTCCAAGATTTCCCCG  | CATGCAGTAGACATGGCAGAA  |
| <i>Klf4</i>    | AGAGGAGCCCAAGCCAAAGAGG  | CCACAGCCGTCCCAGTCACAGT |
| <i>Muc2</i>    | GGTCCAGGGTCTGGATCACA    | GCTCAGCTCACTGCCATCTG   |
| <i>Tgfb1</i>   | ACCATGCCAACTTCTGTC      | CGGGTTGTGTTGGTTGTAGA   |
| <i>Tnfa</i>    | CAAAGGGAGAGTGGTCAGGT    | ATTGCACCTCAGGGAAGAGT   |
| Human          |                         |                        |
| <i>BACTIN</i>  | CTCTTCCAGCCTTCCTTCCTG   | CAGCACTGTGTTGGCGTACAG  |
| <i>IL33</i>    | CACCCCTCAAATGAATCAGG    | GGAGCTCCACAGAGTGTTC    |
| <i>KLF4</i>    | CGGACATCAACGACGTGAG     | GACGCCTTCAGCACGAACT    |
| <i>MUC2</i>    | AGGATGACACCATCTACCTCACC | GGTGTAGGCATCGCTCTTCTC  |

## Supplementary Figures

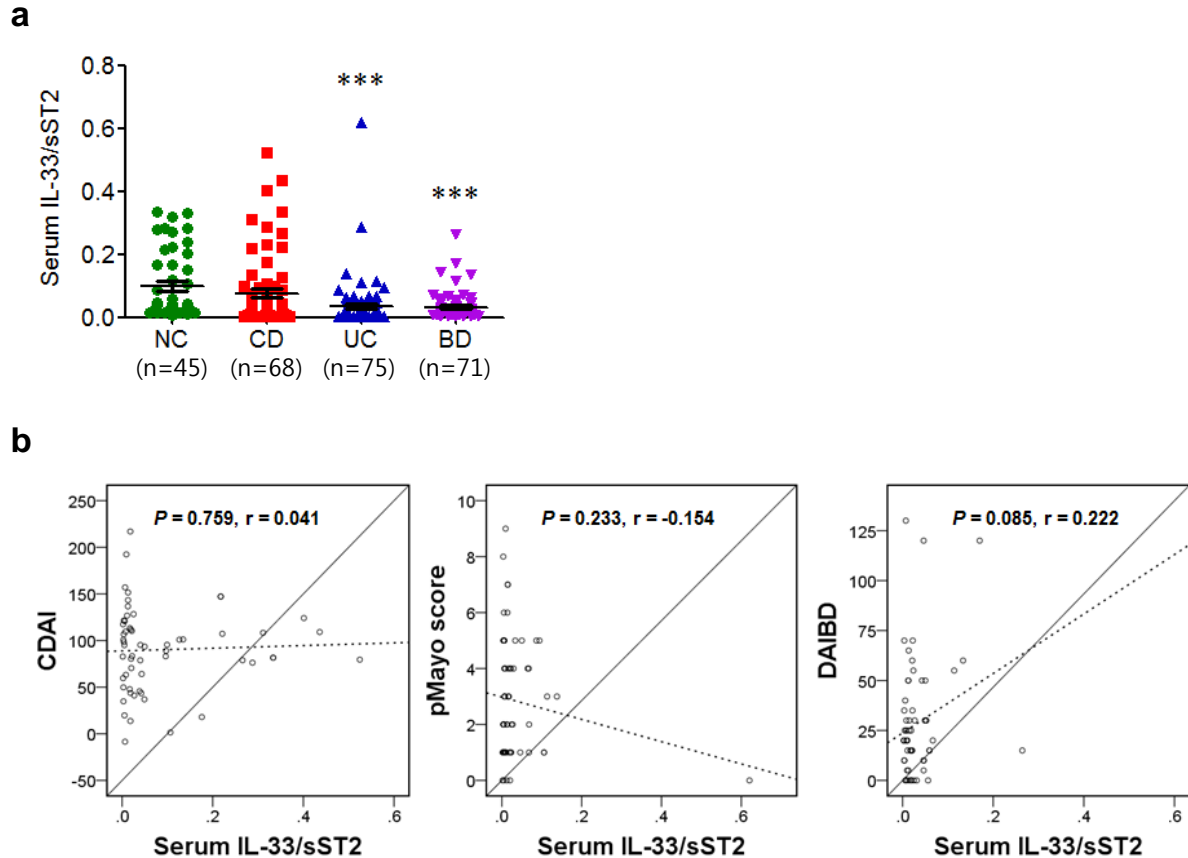

**Figure S1. Ratios of circulating IL-33/ST2 and its correlation with disease activity. (a)** Serum IL-33/sST2 ratios in patients with inflammatory bowel disease (IBD). **(b)** Correlation between serum IL-33/sST2 ratio and IBD clinical disease activity. Solid line, references on the X and Y axes; dotted line, fit for total variables. Results are shown as individual values (symbols) and SDs (lines) for each group of patients. \*\*\* $P < 0.005$  vs. NC as assessed by ANOVA. NC, normal control; CD, Crohn's disease; CDAI, CD activity index; UC, ulcerative colitis; BD, Behçet's disease; DAIBD, disease activity index for intestinal BD.

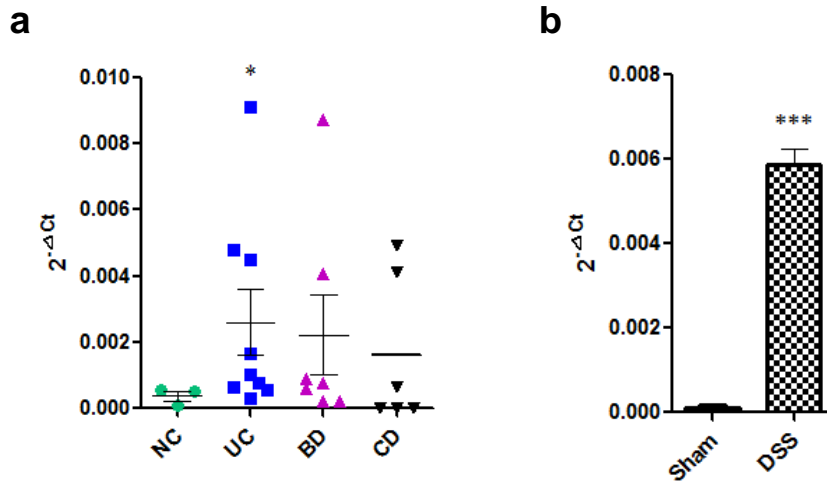

**Figure S2. IL-33 mRNA expression in inflamed mucosal tissue samples.** (a) Colonic biopsy samples were harvested from noninflamed areas of normal control (NC,  $n = 3$ ) patients and from inflamed areas of patients with UC ( $n = 9$ ), BD ( $n = 7$ ), and CD ( $n = 6$ ). Total RNA was extracted and processed for quantitative RT-PCR. IL-33 expression levels were normalised to that of  $\beta$ -actin. Relative mRNA levels were calculated using the  $2^{-\Delta Ct}$  formula. The significance of differences between groups was analysed using Student's  $t$ -test. (b) Effects of IL-33 on dextran sodium sulfate (DSS)-induced colitis in mice ( $n = 5$  mice/group). \* $P < 0.05$  vs. NC, \* $P < 0.05$  vs. Sham. NC, normal control; UC, ulcerative colitis; BD, Behçet's disease; CD, Crohn's disease; Veh, injected with vehicle; IL-33, injected with mrIL-33; TNBS, injected with 2,4,6-trinitrobenzenesulfonic acid.

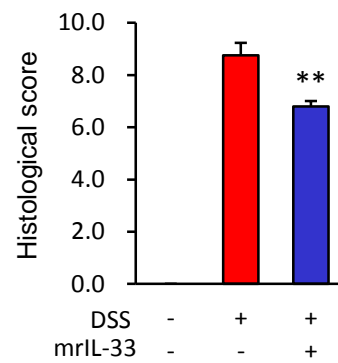

**Figure S3. Histological score of dextran sodium sulfate (DSS)-induced colitis in mice (n = 5).** <sup>\*\*</sup> $P < 0.01$  vs. DSS. IL-33, 5 daily injections of IL-33 (mrIL-33, 0.2  $\mu\text{g}/\text{mouse}$ ); DSS, treated with 3% (w/v) DSS.

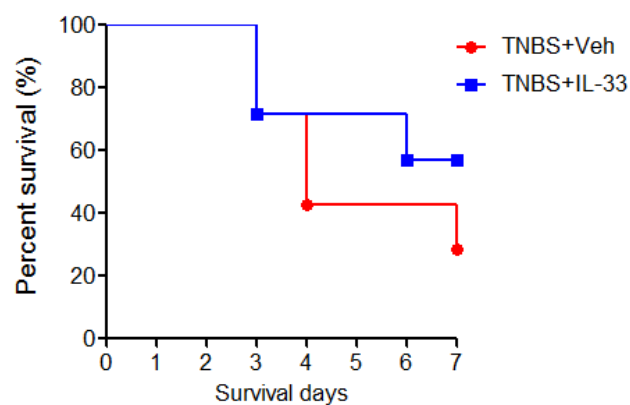

**Figure S4. Effects of IL-33 on the survival of mice with 2,4,6-trinitrobenzenesulfonic acid (TNBS)-induced colitis.** Survival (n = 7) was analysed by generating a Kaplan-Meier plot. Veh, treated with vehicle; IL-33, treated with mrIL-33; TNBS, injected with 2,4,6-trinitrobenzenesulfonic acid.

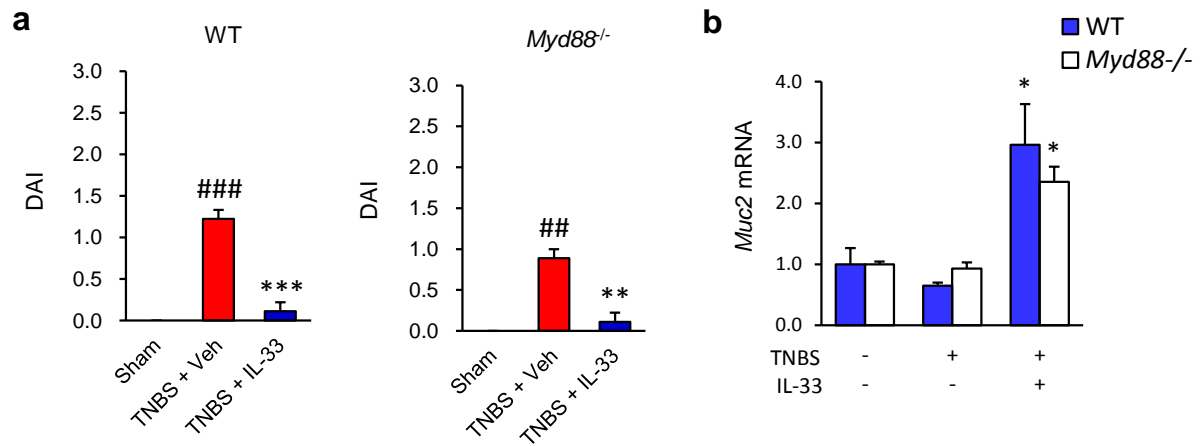

**Figure S5. Effects of IL-33 on disease activity index (DAI, a) and Muc2 expression in colon tissue (b) of wild-type (WT) and Myd88 deficient (*Myd88*<sup>-/-</sup>) mice with 2,4,6-trinitrobenzenesulfonic acid (TNBS)-induced colitis (n = 5).** To assess the effects of IL-33 on enterocyte and macrophage early in disease, 100  $\mu$ l TNBS solution (1.8% (w/v)) in 40% ethanol was injected into the colon of each mouse and DAI score at day 6 (D6) was obtained.  $^{##}P < 0.01$  vs. Sham,  $^{###}P < 0.005$  vs. Sham,  $^{**}P < 0.01$  vs. TNBS,  $^{***}P < 0.005$  vs. TNBS. Veh, treated with vehicle; IL-33, treated with mrIL-33; TNBS, injected with 2,4,6-trinitrobenzenesulfonic acid.

**a**

PBS-PCC

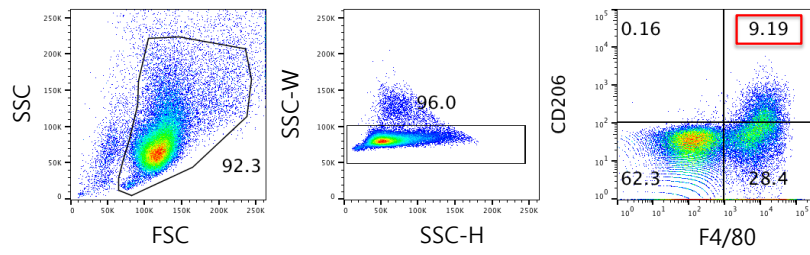

IL-33-PCC

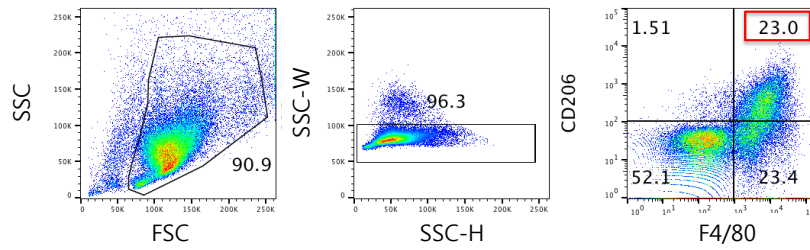**b**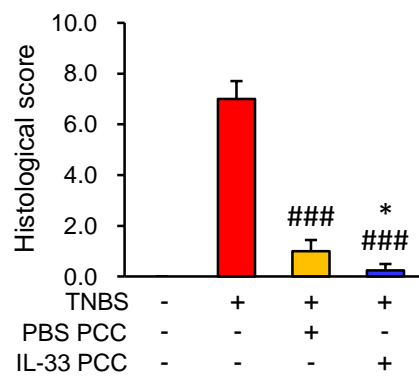**c**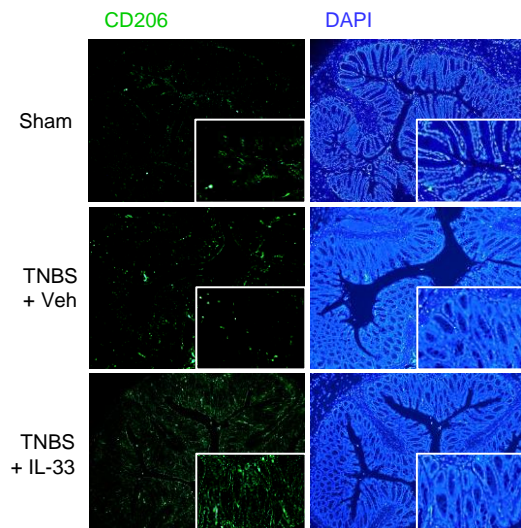

**Figure S6. Mouse PCC transfer model.** Male C57BL/6 mice were inoculated i.p. with IL-33 (1 µg/mouse) or PBS for 3 consecutive days **(a)**. Next, peritoneal cavity cells (PCCs) were extracted from the peritoneum of each mouse by washing the peritoneal cavity with cold PBS. F4/80 positive cells were sorted from the extracted PCCs and i.p. injected ( $1 \times 10^6$  cells) into the recipient mice. After 2 days, 2,4,6-trinitrobenzenesulfonic acid (TNBS) solution was injected into the colon of each recipient mouse **(b,c)**. **(a)** Representative flow cytometry gating strategies of peritoneal cavity cells (PCCs) isolated from PCC-treated mice (n = 5). **(b)** Histological score of the colon from TNBS-treated mice. Values are expressed as means (n = 5); error bars represent  $\pm$ SDs. **(c)** Representative image of mouse colon immunostaining (n = 3–4). CD206 is visualized in green using fluorescent conjugated antibodies. Nuclei were counterstained with DAPI (blue).  $^{###}P < 0.05$  vs. TNBS,  $^{*}P < 0.05$  vs. PBS PCC as assessed by ANOVA. Veh, treated with vehicle; IL-33, treated with mrIL-33; TNBS, injected with 2,4,6-trinitrobenzenesulfonic acid.

**a**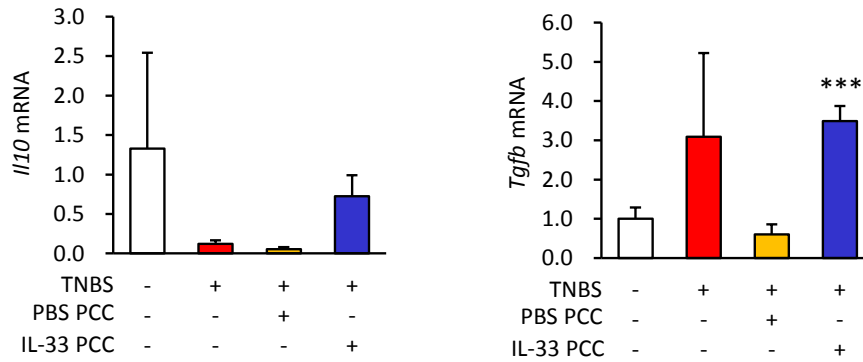**b**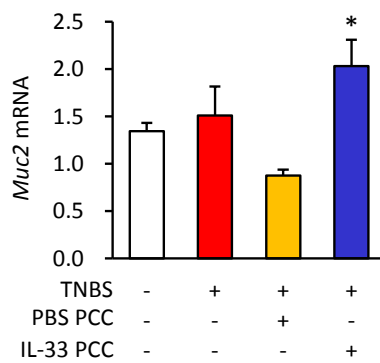

**Figure S7. Effects of IL-33 on the mRNA expression levels of M2 and goblet cell markers in the colons from peritoneal cavity cell (PCC)-treated mice. (a)** mRNA expression of *Il10* and *Tgfb*. **(b)** mRNA expression of *Muc2*. Male C57BL/6 mice (n = 5) were inoculated i.p. with IL-33 (1 µg/mouse) or PBS for 3 consecutive days. Next, peritoneal cavity cells (PCCs) were extracted from the peritoneum of each mouse by washing the peritoneal cavity with cold PBS. F4/80 positive cells were sorted from the isolated PCCs and i.p. injected ( $1 \times 10^6$  cells) into the recipient mice. After 2 days, 2,4,6-trinitrobenzenesulfonic acid (TNBS) solution was injected into the colon of each recipient mouse. \*\*\* $P < 0.005$  vs. PBS PCCs as assessed by ANOVA. Veh, treated with vehicle; IL-33, treated with mrIL-33; TNBS, injected with 2,4,6-trinitrobenzenesulfonic acid.

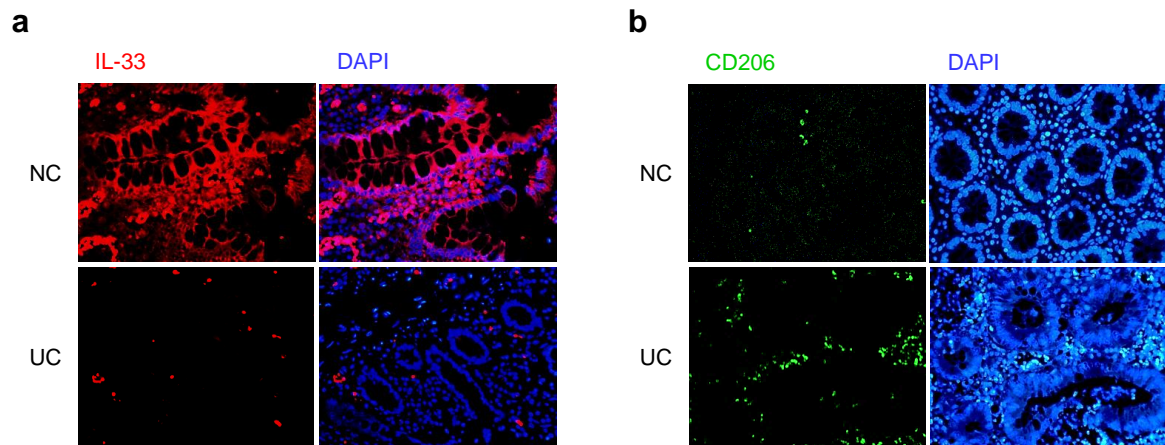

**Figure S8. Representative image of CD206 and IL-33 immunostain in human colon (NC, n = 3; UC, n = 4). (a) CD206 immunostaining (green). (b) IL-33 immunostaining (red). Nuclei were counterstained with DAPI (blue). NC, normal control; UC, ulcerative colitis.**

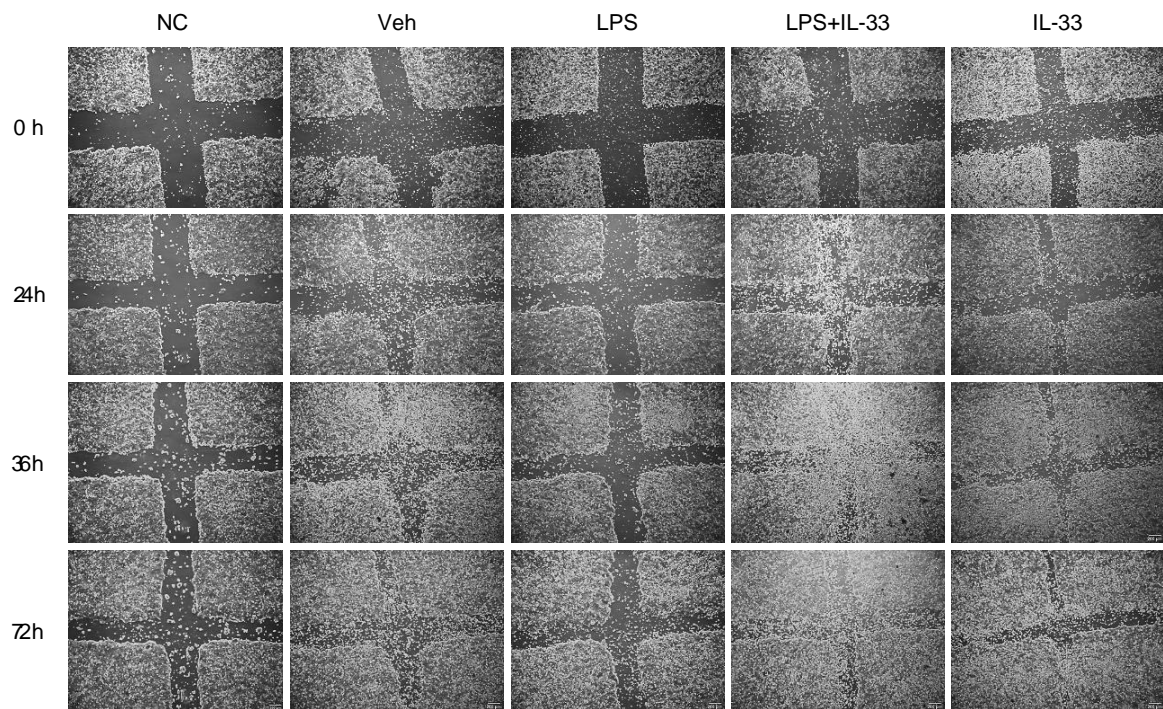

**Figure S9. Wound healing assay. Monocytes were isolated from PBMCs and differentiated into macrophages for 7 days.** Macrophages were cocultured with the HT-29 cells and wound healing assays were performed. Representative images show increased wound closures by IL-33 treatment. Data are presented as means  $\pm$ SD ( $n = 2$ ).  $*P < 0.05$  vs. Veh as assessed by Student's  $t$ -test. NC, not cocultured; Veh, treated with vehicle; IL-33, treated with hrIL-33; LPS, treated with lipopolysaccharide.  $*P < 0.05$  vs. LPS.
